# Supplementary material for: Energy optimization during walking involves implicit processing
Source: Oxford University Press journal article supplement (doi:10.1242/jeb.242655), 2021-09-01
Supplement: jeb242655supp.pdf [file jeb242655supp.pdf]

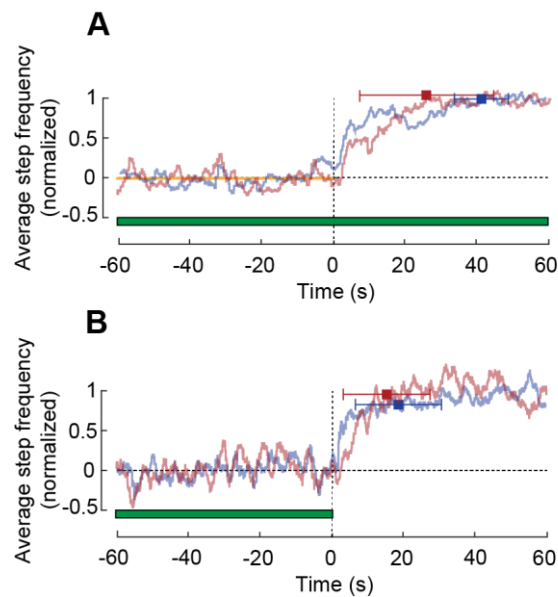

**Fig. S1. Averaged and normalized step frequency data during adaptation (A) and de-adaptation (B).** Dual-task data are shown in blue and single-task data are shown in red. In A, data are averaged across participants who experienced a first metronome hold from -15% step frequency (dual-task:  $n=3$ , single-task:  $n=4$ ). The horizontal yellow line represents the period when the metronome was turned on. In B, data are averaged across all participants (dual-task:  $n=8$ , single-task:  $n=14$ ). In A and B, across-participant average time to reach steady-state is indicated by a square, with horizontal error bars representing one standard deviation. The solid green bar indicates when the exoskeleton controller was on. The dashed vertical line represents the moment of metronome release in A and exoskeleton controller shutoff in B.
